# Supplementary material
Source: PubMed Central journal article supplement (PMC2920051)

# Catalysis of Carboxypeptidase A: Promoted-water vs Nucleophilic Pathways

Shanshan Wu<sup>1</sup>, Chunchun Zhang<sup>2</sup>, Dingguo Xu<sup>1,\*</sup> and Hua Guo<sup>3,\*</sup>

<sup>1</sup> *College of Chemistry, MOE Key Laboratory of Green Chemistry & Technology,*

*Sichuan University, Chengdu, Sichuan 610064, P. R. China*

<sup>2</sup> *Analytical & Testing Center, Sichuan University, Chengdu, Sichuan 610064, P.R.*

*China*

<sup>3</sup> *Department of Chemistry and Chemical Biology, University of New Mexico,*

*Albuquerque, New Mexico 87131, USA*

## Support information:

### 1. Stationary point structures along the promoted-water pathway for the ester substrate

The structures of six stationary points along the promoted-water pathway for the ester substrate identified by DFT full optimization at the B3LYP/6-31G(d) level of theory are displayed in Fig. S1. The key internuclear distances are listed in Table S1.

### 2. Stationary point structures along the nucleophilic pathway for an ester substrate

The structures of six stationary points along the nucleophilic pathway for the ester substrate identified by DFT full optimization at the B3LYP/6-31G(d) level of theory are displayed in Fig. S2. The key internuclear distances are listed in Table S2.

### 3. Full citations of Refs 57 and 85.

(57) MacKerell Jr., A. D.; Bashford, D.; Bellott, M.; Dunbrack Jr., R. L.; Evanseck, J. D.; Field, M. J.; Fischer, S.; Gao, J.; Guo, H.; Ha, S.; Joseph-McCarthy, D.; Kuchnir, L.; Kuczera, K.; Lau, F. T. K.; Mattos, C.; Michnick, S.; Ngo, T.; Nguyen, D. T.; Prodhom, B.; Reiher III, W. E.; Roux, B.; Schlenkrich, M.; Smith, J. C.; Stote, R.; Straub, J.; Watanabe, M.; Wiorkiewicz-Kuczera, J.; Yin, D.; Karplus, M. *J. Phys. Chem. B* **1998**, *102*, 3586-3616.

(85) Frisch, M. J.; Trucks, G. W.; Schlegel, H. B.; Scuseria, G. E.; Robb, M. A.; Cheeseman, J. R.; Montgomery, J. A.; Vreven Jr., T.; Kudin, K. N.; Burant, J. C.; Millam, J. M.; Iyengar, S. S.; Tomasi, J.; Barone, V.; Mennucci, B.; Cossi, M.; Scalmani, G.; Rega, N.; Petersson, G. A.; Nakatsuji, H.; Hada, M.; Ehara, M.; Toyota, K.; Fukuda, R.; Hasegawa, J.; Ishida, M.; Nakajima, T.; Honda, Y.; Kitao, O.; Nakai, H.; Klene, M.; Li, X.; Knox, J. E.; Hratchian, H. P.; Cross, J. B.; Adamo, C.; Jaramillo, J.; Gomperts, R.; Stratmann, R. E.; Yazyev, O.; Austin, A. J.; Cammi, R.; Pomelli, C.; Ochterski, J. W.; Ayala, P. Y.; Morokuma, K.; Voth, G. A.; Salvador, P.; Dannenberg, J. J.; Zakrzewski, V. G.; Dapprich, S.; Daniels, A. D.; Strain, M. C.; Farkas, O.; Malick, D. K.; Rabuck, A. D.; Raghavachari, K.; Foresman, J. B.; Ortiz, J. V.; Cui, Q.; Baboul, A. G.; Clifford, S.; Cioslowski, J.; Stefanov, B. B.; Liu, G.; Liashenko, A.; Piskorz, P.; Komaromi, I.; Martin, R. L.; Fox, D. J.; Keith, T.; Al-Laham, M. A.; Peng, C. Y.; Nanayakkara, A.; Challacombe, M.; Gill, P. M. W.; Johnson, B.; Chen, W.; Wong, M. W.; Gonzalez, C.; Pople, J. A.; Gaussian, Inc.: Pittsburgh, PA, 2003.

Table S1. Key geometric parameters of stationary points for the promoted-water pathway obtained at the B3LYP/6-31G(d) level of theory with the truncated active-site model.

| Distance (Å)                              | Truncated Model |      |      |      |      |      |
|-------------------------------------------|-----------------|------|------|------|------|------|
|                                           | ES              | TS1  | TI1  | TI2  | TS3  | EP   |
| O <sub>w</sub> ···C <sub>6</sub>          | 3.55            | 1.84 | 1.43 | 1.41 | 1.34 | 1.25 |
| H <sub>1</sub> ···O <sub>ε2</sub> (E270)  | 1.04            | 1.00 | 0.99 | 1.00 | 1.22 | 1.83 |
| Zn···N <sub>δ1</sub> (H69)                | 2.01            | 2.11 | 2.02 | 2.05 | 2.03 | 2.05 |
| Zn···O <sub>ε2</sub> (E72)                | 1.95            | 1.95 | 1.95 | 1.97 | 1.95 | 1.95 |
| Zn···N <sub>δ1</sub> (H196)               | 2.06            | 2.04 | 2.02 | 2.04 | 2.03 | 2.01 |
| O <sub>w</sub> ···Zn                      | 1.94            | 2.06 | 3.05 | 3.04 | 3.22 | 3.12 |
| Zn···O <sub>7</sub>                       | 4.02            | 2.37 | 1.97 | 1.93 | 1.95 | 1.99 |
| O <sub>7</sub> ···H <sub>21</sub> (R127)  | 1.89            | 1.82 | 1.88 | 1.99 | 2.59 | 4.18 |
| O <sub>7</sub> ···H <sub>11</sub> (R127)  | 2.60            | 3.38 | 3.62 | 3.69 | 3.91 | 4.93 |
| O <sub>12</sub> ···H <sub>11</sub> (R127) | 4.39            | 1.85 | 1.83 | 1.77 | 1.86 | 1.94 |
| O <sub>13</sub> ···H <sub>22</sub> (N144) | -               | -    | -    | -    | -    | -    |
| O <sub>12</sub> ···H <sub>21</sub> (R145) | 1.68            | 1.67 | 1.72 | 1.68 | 1.68 | 1.69 |
| O <sub>13</sub> ···H <sub>11</sub> (R145) | 1.70            | 1.71 | 1.69 | 1.68 | 1.69 | 1.71 |
| O <sub>12</sub> ···H <sub>η</sub> (Y248)  | -               | -    | -    | -    | -    | -    |
| O <sub>7</sub> ···H <sub>η</sub> (Y248)   | -               | -    | -    | -    | -    | -    |
| C <sub>5</sub> ···C <sub>6</sub>          | 1.52            | 1.53 | 1.55 | 1.56 | 1.54 | 1.53 |
| C <sub>6</sub> ···O <sub>7</sub>          | 1.22            | 1.27 | 1.35 | 1.34 | 1.29 | 1.27 |
| C <sub>6</sub> ···O <sub>9</sub>          | 1.33            | 1.36 | 1.45 | 1.48 | 1.89 | 4.00 |
| H <sub>1</sub> ···O <sub>9</sub>          | -               | -    | -    | 1.77 | 1.21 | 0.98 |

Table S2. Key geometric parameters of stationary points for the nucleophilic pathway obtained at the B3LYP/6-31G(d) level of theory with the truncated active-site model.

| Distance (Å)                             | Truncated Model |      |      |      |      |      |
|------------------------------------------|-----------------|------|------|------|------|------|
|                                          | ES              | TS1  | AE1  | AE2  | TS2  | EP   |
| C <sub>5</sub> ...C <sub>6</sub>         | 1.52            | 1.54 | 1.55 | 1.55 | 1.54 | 1.53 |
| C <sub>6</sub> ...O <sub>7</sub>         | 1.24            | 1.29 | 1.34 | 1.32 | 1.29 | 1.28 |
| C <sub>6</sub> ...O <sub>9</sub>         | 1.31            | 1.35 | 1.40 | 1.42 | 1.88 | 5.72 |
| C <sub>6</sub> ...O <sub>ε2</sub>        | 3.01            | 1.82 | 1.51 | 1.51 | 1.36 | 1.24 |
| O <sub>w</sub> ...C <sub>δ</sub> (E270)  | -               | -    | -    | 3.47 | 1.77 | 1.34 |
| H <sub>2</sub> ...O <sub>9</sub>         | -               | -    | -    | 1.99 | 1.18 | 0.97 |
| H <sub>2</sub> ...O <sub>w</sub>         | -               | -    | -    | 0.97 | 1.25 | 2.01 |
| O <sub>ε2</sub> ...C <sub>δ</sub> (E270) | -               | -    | -    | 1.34 | 1.50 | 3.68 |
| Zn...N <sub>δ1</sub> (H69)               | 2.01            | 2.07 | 2.03 | 2.03 | 2.03 | 2.03 |
| Zn...O <sub>ε2</sub> (E72)               | 1.93            | 1.95 | 1.95 | 1.94 | 1.94 | 1.94 |
| Zn...N <sub>δ1</sub> (H196)              | 2.00            | 2.06 | 2.03 | 2.02 | 2.01 | 2.02 |
| Zn...O <sub>7</sub>                      | 2.01            | 1.99 | 1.94 | 1.94 | 1.96 | 1.98 |
| O <sub>12</sub> ...H11(R127)             | 1.86            | 1.87 | 1.79 | 1.84 | 1.86 | 1.94 |
| O <sub>12</sub> ...H21(R145)             | 1.73            | 1.71 | 1.69 | 1.69 | 1.73 | 1.84 |
| O <sub>13</sub> ...H11(R145)             | 1.67            | 1.67 | 1.67 | 1.67 | 1.66 | 1.84 |

Fig. S1. Stationary point structures of the promoted-water pathway for the ester substrate obtained at the B3LYP/6-31G(d) level of theory.

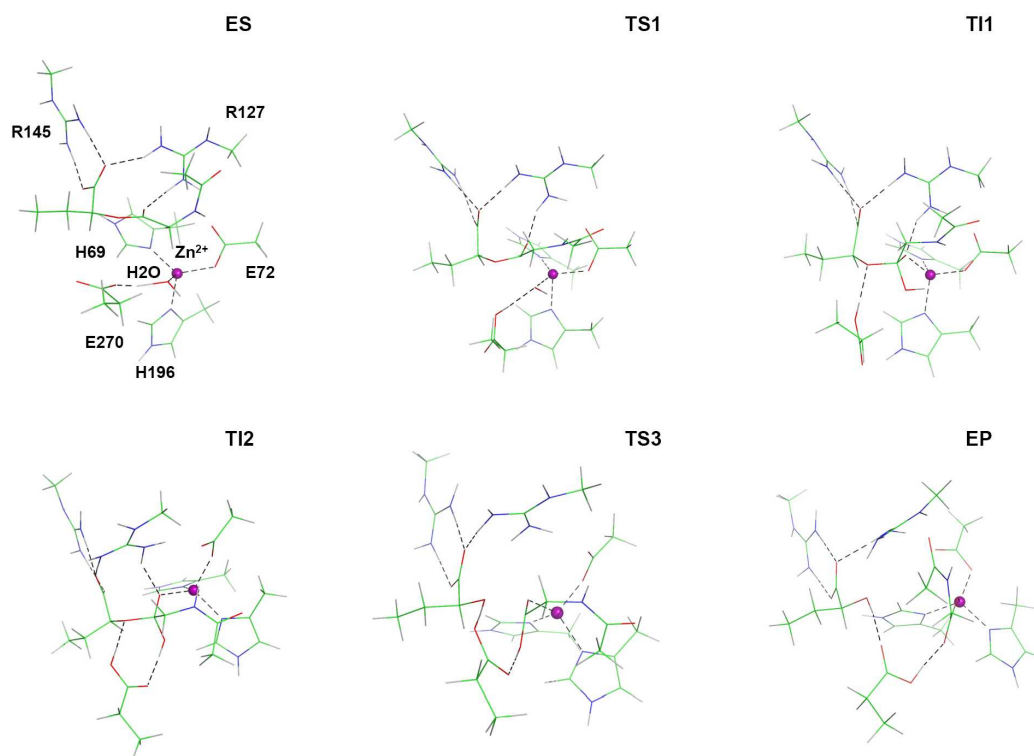

Fig. S2. Stationary point structures of the nucleophilic pathway for the ester substrate obtained at the B3LYP/6-31G(d) level of theory.

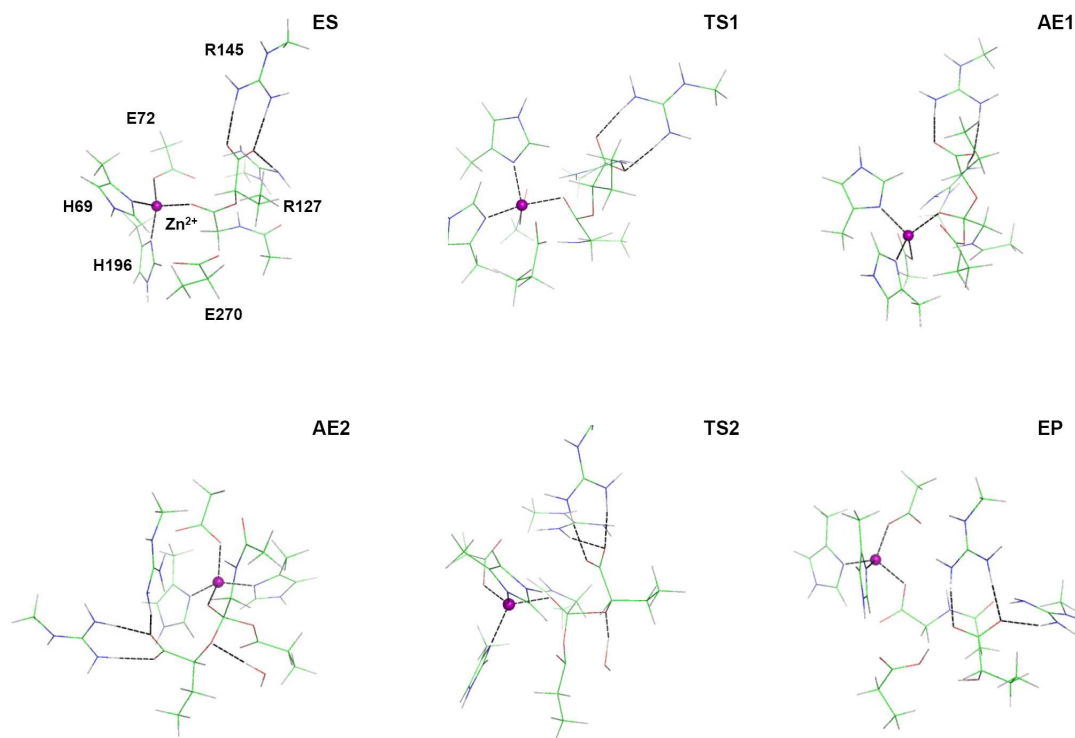

Supplement: NIHMS217952-supplement-1_si_001.pdf [file NIHMS217952-supplement-1_si_001.pdf]
